# Supplementary material for: Osteoporosis Recovery by Antrodia camphorata Alcohol Extracts through Bone Regeneration in SAMP8 Mice
Source: Hindawi journal article supplement (doi:10.1155/2016/2617868), 2016-01-01

# BMD analysis

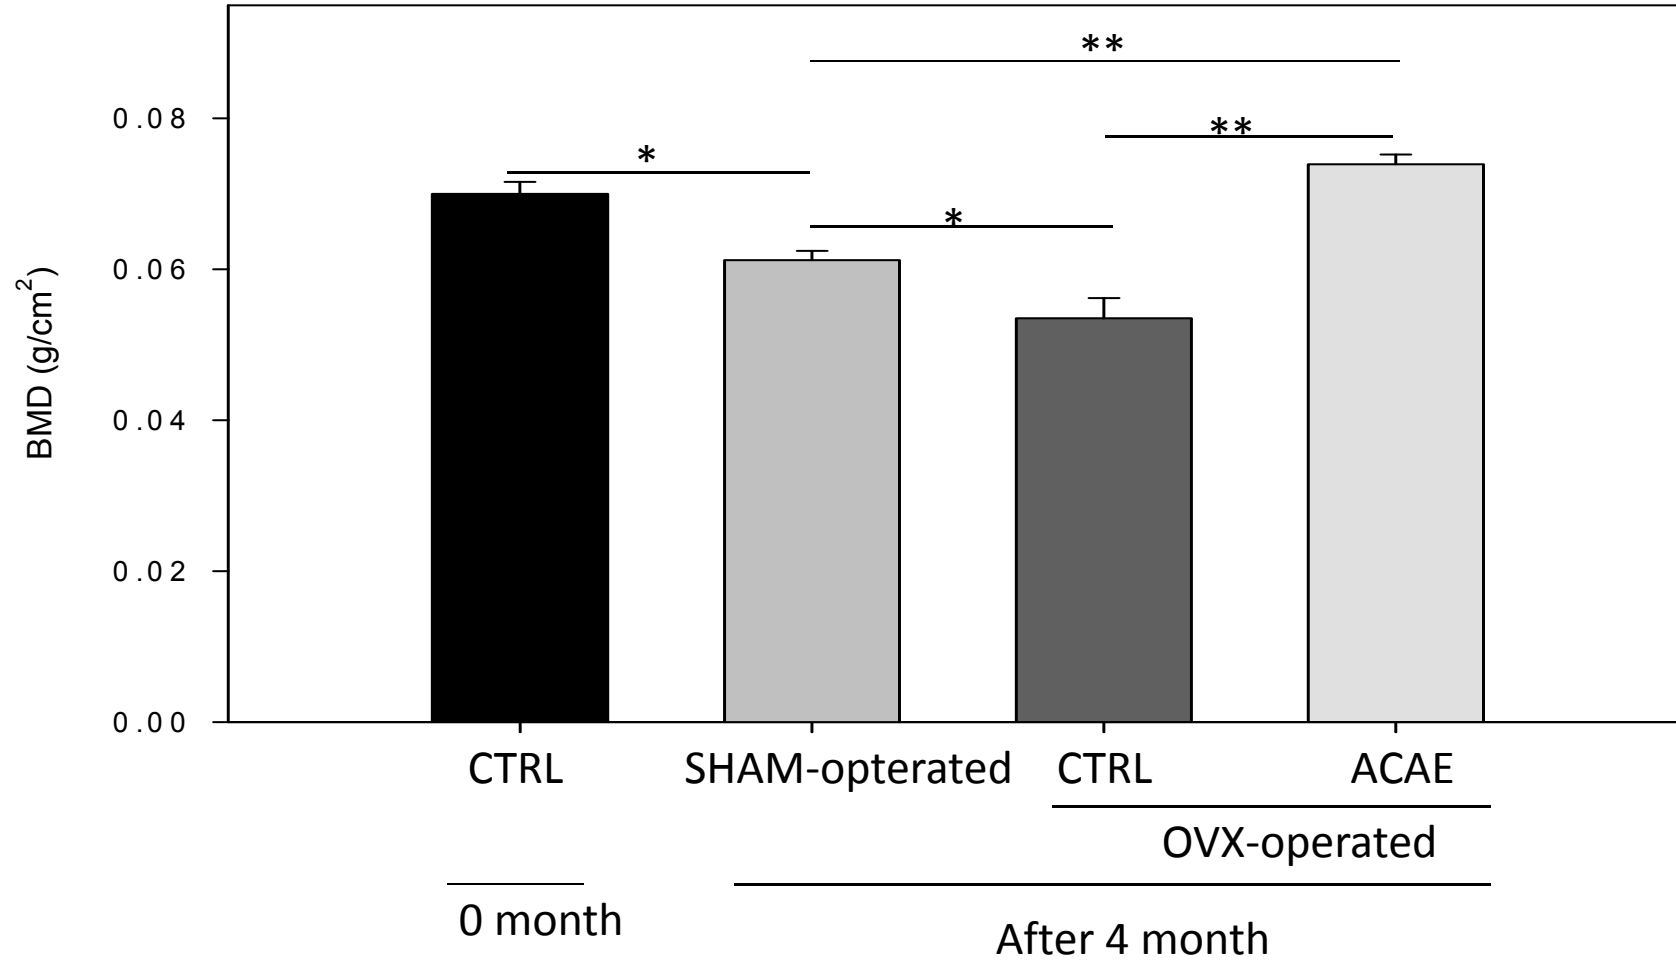

Supplement: f1 [file 2617868.f1.pdf]
